# Supplementary material for: On the Reaction Mechanism of the 3,4-Dimethoxybenzaldehyde Formation from 1-(3′,4′-Dimethoxyphenyl)Propene
Source: MDPI journal article supplement (doi:10.3390/molecules23020412), 2018-02-14
Supplement: s1 [file s1]

**Table S1: Total reaction and activation energies, enthalpies, entropies and Gibbs free energies**

| <b>Structure TS1</b> | <b>Hartrees</b> | <b>kcal/mol</b> |
|----------------------|-----------------|-----------------|
| Energy               | -803.5522       | -504237         |
| Enthalpy             | -803.5513       | -504236.5       |
| Gibbs                | -803.6143       | -504276         |
| Entropy              | 132.652         | cal/mol.K       |

| <b>Structure TS2</b> | <b>Hartrees</b> | <b>kcal/mol</b> |
|----------------------|-----------------|-----------------|
| Energy               | -652.6689       | -409556.3       |
| Enthalpy             | -652.668        | -409555.7       |
| Gibbs                | -652.7242       | -409591         |
| Entropy              | 118.476         | cal/mol.K       |

| <b>Structure TS3</b> | <b>Hartrees</b> | <b>kcal/mol</b> |
|----------------------|-----------------|-----------------|
| Energy               | -802.926        | -503844.1       |
| Enthalpy             | -802.9251       | -503843.5       |
| Gibbs                | -802.9877       | -503882.8       |
| Entropy              | 131.927         | cal/mol.K       |

| <b>Structure TS4</b> | <b>Hartrees</b> | <b>kcal/mol</b> |
|----------------------|-----------------|-----------------|
| Energy               | -802.925        | -503843.5       |
| Enthalpy             | -802.924        | -503842.9       |
| Gibbs                | -802.9842       | -503880.6       |
| Entropy              | 126.539         | cal/mol.K       |

| <b>Structure 1</b> | <b>Hartrees</b> | <b>kcal/mol</b> |
|--------------------|-----------------|-----------------|
| Energy             | -577.5459       | -362415.8       |
| Enthalpy           | -577.5450       | -362415.3       |
| Gibbs              | -577.5999       | -362449.7       |
| Entropy            | 115.505         | cal/mol.K       |

| <b>Structure 2</b> | <b>Hartrees</b> | <b>kcal/mol</b> |
|--------------------|-----------------|-----------------|
| Energy             | -577.3363       | -362284.3       |
| Enthalpy           | -577.3354       | -362283.7       |
| Gibbs              | -577.3906       | -362318.4       |
| Entropy            | 116.148         | cal/mol.K       |

| <b>Structure 3</b> | <b>Hartrees</b> | <b>kcal/mol</b> |
|--------------------|-----------------|-----------------|
| Energy             | -803.6045       | -504269.8       |

|          |           |           |
|----------|-----------|-----------|
| Enthalpy | -803.6035 | -504269.3 |
| Gibbs    | -803.6668 | -504308.9 |
| Entropy  | 133.071   | cal/mol.K |

|                    |                 |                 |
|--------------------|-----------------|-----------------|
| <b>Structure 4</b> | <b>Hartrees</b> | <b>kcal/mol</b> |
| Energy             | -652.747        | -409605.3       |
| Enthalpy           | -652.7461       | -409604.7       |
| Gibbs              | -652.8029       | -409640.4       |
| Entropy            | 119.577         | cal/mol.K       |

|                    |                 |                 |
|--------------------|-----------------|-----------------|
| <b>Structure 5</b> | <b>Hartrees</b> | <b>kcal/mol</b> |
| Energy             | -652.7623       | -409614.9       |
| Enthalpy           | -652.7613       | -409614.3       |
| Gibbs              | -652.8189       | -409650.4       |
| Entropy            | 121.116         | cal/mol.K       |

|                    |                 |                 |
|--------------------|-----------------|-----------------|
| <b>Structure 6</b> | <b>Hartrees</b> | <b>kcal/mol</b> |
| Energy             | -652.1316       | -409219.1       |
| Enthalpy           | -652.1306       | -409218.5       |
| Gibbs              | -652.1885       | -409254.8       |
| Entropy            | 121.771         | cal/mol.K       |

|                    |                 |                 |
|--------------------|-----------------|-----------------|
| <b>Structure 7</b> | <b>Hartrees</b> | <b>kcal/mol</b> |
| Energy             | -803.0517       | -503923         |
| Enthalpy           | -803.0508       | -503922.4       |
| Gibbs              | -803.1136       | -503961.8       |
| Entropy            | 132.168         | cal/mol.K       |

|                    |                 |                 |
|--------------------|-----------------|-----------------|
| <b>Structure 8</b> | <b>Hartrees</b> | <b>kcal/mol</b> |
| Energy             | -574.2225       | -360330.4       |
| Enthalpy           | -574.2216       | -360329.8       |
| Gibbs              | -574.2713       | -360361         |
| Entropy            | 104.707         | cal/mol.K       |

|                     |                 |                 |
|---------------------|-----------------|-----------------|
| <b>Hidrogen ion</b> | <b>Hartrees</b> | <b>kcal/mol</b> |
| Energy              | -0.163147       | -102.3764       |
| Enthalpy            | -0.162203       | -101.784        |
| Gibbs               | -0.174563       | -109.54         |
| Entropy             | 26.014          | cal/mol.K       |

|              |                 |                 |
|--------------|-----------------|-----------------|
| <b>Water</b> | <b>Hartrees</b> | <b>kcal/mol</b> |
|--------------|-----------------|-----------------|

|          |           |           |
|----------|-----------|-----------|
| Energy   | -76.37911 | -47928.65 |
| Enthalpy | -76.37816 | -47928.06 |
| Gibbs    | -76.40024 | -47941.92 |
| Entropy  | 46.475    | cal/mol.K |

|                    |                 |                 |
|--------------------|-----------------|-----------------|
| <b>OOH radical</b> | <b>Hartrees</b> | <b>kcal/mol</b> |
| Energy             | -150.8354       | -94650.74       |
| Enthalpy           | -150.8345       | -94650.14       |
| Gibbs              | -150.8604       | -94666.42       |
| Entropy            | 54.602          | cal/mol.K       |

|                         |                 |                 |
|-------------------------|-----------------|-----------------|
| <b>Hydrogen radical</b> | <b>Hartrees</b> | <b>kcal/mol</b> |
| Energy                  | -0.496912       | -311.8172       |
| Enthalpy                | -0.495968       | -311.2249       |
| Gibbs                   | -0.508982       | -319.3913       |
| Entropy                 | 27.392          | cal/mol.K       |

|                    |                 |                 |
|--------------------|-----------------|-----------------|
| <b>Acetic acid</b> | <b>Hartrees</b> | <b>kcal/mol</b> |
| Energy             | -228.9431       | -143664.1       |
| Enthalpy           | -228.9422       | -143663.5       |
| Gibbs              | -228.9746       | -143683.8       |
| Entropy            | 68.195          | cal/mol.K       |

|               |                 |                 |
|---------------|-----------------|-----------------|
| <b>Oxygen</b> | <b>Hartrees</b> | <b>kcal/mol</b> |
| Energy        | -149.5267       | -93829.51       |
| Enthalpy      | -149.5258       | -93828.92       |
| Gibbs         | -149.5479       | -93842.82       |
| Entropy       | 4.979           | cal/mol.K       |

| <b>Step TS1</b>                                                                                                          | <b>Reaction molar<br/>standar</b> | <b>Activation</b> |
|--------------------------------------------------------------------------------------------------------------------------|-----------------------------------|-------------------|
|                                                                                                                          | <b>kcal/mol</b>                   | <b>kcal/mol</b>   |
| $\Delta E^0 = (\text{Structure 4} + \text{OOH radical}) - \text{Structure 3}$<br>$E^A = \text{TS1} - \text{Structure 3}$ |                                   |                   |
| Energy                                                                                                                   | 13.81                             | 32.80             |
| Enthalpy                                                                                                                 | 14.40                             | 32.80             |
| Gibbs                                                                                                                    | 2.15                              | 32.92             |
| Entropy                                                                                                                  | 41.11                             | -0.42             |
| PV                                                                                                                       | 0.59                              | 0.00              |

| Step TS2                                                                                          | Reaction molar<br>standar | Activation |
|---------------------------------------------------------------------------------------------------|---------------------------|------------|
|                                                                                                   | kcal/mol                  | kcal/mol   |
| $\Delta E^0 = \text{Structure 5} - \text{Structure 4}$<br>$E^A = \text{TS2} - \text{Structure 4}$ |                           |            |
| Energy                                                                                            | -9.56                     | 49.03      |
| Enthalpy                                                                                          | -9.56                     | 49.03      |
| Gibbs                                                                                             | -10.01                    | 49.36      |
| Entropy                                                                                           | 1.54                      | -1.10      |
| pv                                                                                                | 0.00                      | 0.00       |

| Step TS3                                                                                                                                | Reaction molar<br>standar | Activation |
|-----------------------------------------------------------------------------------------------------------------------------------------|---------------------------|------------|
|                                                                                                                                         | kcal/mol                  | kcal/mol   |
| $\Delta E^0 = \text{Structure 7} - (\text{Structure 6} + \text{OOH rad})$<br>$E^A = \text{TS3} - (\text{Structure 6} + \text{OOH rad})$ |                           |            |
| Energy                                                                                                                                  | -53.17                    | 25.71      |
| Enthalpy                                                                                                                                | -53.76                    | 25.12      |
| Gibbs                                                                                                                                   | -40.58                    | 38.37      |
| Entropy                                                                                                                                 | -44.21                    | -44.45     |
| pv                                                                                                                                      | -0.59                     | -0.59      |

| Step TS4                                                                                                                 | Reaction molar<br>standar | Activation |
|--------------------------------------------------------------------------------------------------------------------------|---------------------------|------------|
|                                                                                                                          | kcal/mol                  | kcal/mol   |
| $\Delta E^0 = (\text{Structure 8} + \text{Acetic acid}) - \text{Structure 7}$<br>$E^A = \text{TS4} - \text{Structure 7}$ |                           |            |
| Energy                                                                                                                   | -71.50                    | 79.52      |
| Enthalpy                                                                                                                 | -70.91                    | 79.52      |
| Gibbs                                                                                                                    | -83.06                    | 81.20      |
| Entropy                                                                                                                  | 40.73                     | -5.63      |
| pv                                                                                                                       | 0.59                      | 0.00       |
