# Supplementary material for: On the Reaction Mechanism of the 3,4-Dimethoxybenzaldehyde Formation from 1-(3′,4′-Dimethoxyphenyl)Propene
Source: MDPI journal article supplement (doi:10.3390/molecules23020412), 2018-02-14
Supplement: s1 [file s1]

**Table S2: Frequencies of Transition states**

**TS1**

| Mode # | Freq    | Infrared  |
|--------|---------|-----------|
| 1      | -842.67 | 1046.7297 |

**TS2**

| Mode # | Freq     | Infrared  |
|--------|----------|-----------|
| 1      | -2197.37 | 2162.0733 |

**TS3**

| Mode # | Freq    | Infrared |
|--------|---------|----------|
| 1      | -433.46 | 995.5108 |

**TS4**

| Mode # | Freq     | Infrared  |
|--------|----------|-----------|
| 1      | -1151.23 | 1221.3764 |
