# Supplementary material for: On the Reaction Mechanism of the 3,4-Dimethoxybenzaldehyde Formation from 1-(3′,4′-Dimethoxyphenyl)Propene
Source: MDPI journal article supplement (doi:10.3390/molecules23020412), 2018-02-14
Supplement: s1 [file s1]

**Table S3: Kinetic Parameters**

| TS1                                     |       |            |
|-----------------------------------------|-------|------------|
| # Total Energy along IRC                |       |            |
| # X-Axis: Intrinsic Reaction Coordinate |       |            |
| # Y-Axis: Total Energy (kcal/mol)       |       |            |
| Points                                  | X     | Y          |
| 1                                       | 2.86  | -504414.18 |
| 2                                       | 2.72  | -504413.36 |
| 3                                       | 2.58  | -504412.54 |
| 4                                       | 2.43  | -504411.74 |
| 5                                       | 2.29  | -504410.94 |
| 6                                       | 2.15  | -504410.17 |
| 7                                       | 2.00  | -504409.40 |
| 8                                       | 1.86  | -504408.66 |
| 9                                       | 1.72  | -504407.94 |
| 10                                      | 1.57  | -504407.24 |
| 11                                      | 1.43  | -504406.57 |
| 12                                      | 1.29  | -504405.93 |
| 13                                      | 1.14  | -504405.31 |
| 14                                      | 1.00  | -504404.73 |
| 15                                      | 0.85  | -504404.19 |
| 16                                      | 0.71  | -504403.68 |
| 17                                      | 0.57  | -504403.21 |
| 18                                      | 0.42  | -504402.79 |
| 19                                      | 0.28  | -504402.39 |
| 20                                      | 0.14  | -504402.12 |
| 21                                      | 0.00  | -504401.99 |
| 22                                      | -0.14 | -504402.22 |
| 23                                      | -0.29 | -504403.06 |
| 24                                      | -0.43 | -504404.61 |
| 25                                      | -0.57 | -504406.71 |
| 26                                      | -0.72 | -504408.90 |
| 27                                      | -0.86 | -504410.65 |
| 28                                      | -1.00 | -504412.04 |
| 29                                      | -1.14 | -504413.29 |
| 30                                      | -1.28 | -504414.45 |
| 31                                      | -1.43 | -504415.54 |
| 32                                      | -1.57 | -504416.57 |
| 33                                      | -1.71 | -504417.53 |
| 34                                      | -1.86 | -504418.43 |
| 35                                      | -2.00 | -504419.28 |
| 36                                      | -2.14 | -504420.07 |
| 37                                      | -2.29 | -504420.80 |
| 38                                      | -2.43 | -504421.48 |

|    |       |            |
|----|-------|------------|
| 39 | -2.57 | -504422.10 |
| 40 | -2.72 | -504422.69 |
| 41 | -2.86 | -504423.23 |

| TS1 Reaction Force |                     |                |
|--------------------|---------------------|----------------|
| Point              | Reaction coordinate | Reaction Force |
| 1                  | -2.86               | -5.75          |
| 2                  | -2.72               | -5.68          |
| 3                  | -2.57               | -5.62          |
| 4                  | -2.43               | -5.51          |
| 5                  | -2.29               | -5.42          |
| 6                  | -2.14               | -5.31          |
| 7                  | -2.00               | -5.16          |
| 8                  | -1.86               | -5.05          |
| 9                  | -1.71               | -4.84          |
| 10                 | -1.57               | -4.67          |
| 11                 | -1.43               | -4.48          |
| 12                 | -1.28               | -4.28          |
| 13                 | -1.14               | -4.07          |
| 14                 | -1.00               | -3.90          |
| 15                 | -0.86               | -3.64          |
| 16                 | -0.72               | -3.29          |
| 17                 | -0.57               | -2.90          |
| 18                 | -0.43               | -2.81          |
| 19                 | -0.29               | -1.88          |
| 20                 | -0.14               | -0.89          |
| 21                 | 0.00                | 1.61           |
| 22                 | 0.14                | 5.98           |
| 23                 | 0.28                | 10.83          |
| 24                 | 0.42                | 14.63          |
| 25                 | 0.57                | 15.25          |
| 26                 | 0.71                | 12.20          |
| 27                 | 0.85                | 9.73           |
| 28                 | 1.00                | 8.69           |
| 29                 | 1.14                | 8.09           |
| 30                 | 1.29                | 7.56           |
| 31                 | 1.43                | 7.14           |
| 32                 | 1.57                | 6.68           |
| 33                 | 1.72                | 6.33           |
| 34                 | 1.86                | 5.88           |
| 35                 | 2.00                | 5.49           |
| 36                 | 2.15                | 5.10           |
| 37                 | 2.29                | 4.72           |
| 38                 | 2.43                | 4.37           |

|    |      |      |
|----|------|------|
| 39 | 2.58 | 4.11 |
| 40 | 2.72 | 3.78 |

| TS1 Force constant |                     |                |
|--------------------|---------------------|----------------|
| Point              | Reaction coordinate | Force constant |
| 1                  | -2.86               | -0.48          |
| 2                  | -2.72               | -0.42          |
| 3                  | -2.57               | -0.76          |
| 4                  | -2.43               | -0.62          |
| 5                  | -2.29               | -0.77          |
| 6                  | -2.14               | -1.01          |
| 7                  | -2.00               | -0.80          |
| 8                  | -1.86               | -1.44          |
| 9                  | -1.71               | -1.20          |
| 10                 | -1.57               | -1.34          |
| 11                 | -1.43               | -1.39          |
| 12                 | -1.28               | -1.49          |
| 13                 | -1.14               | -1.17          |
| 14                 | -1.00               | -1.82          |
| 15                 | -0.86               | -2.49          |
| 16                 | -0.72               | -2.74          |
| 17                 | -0.57               | -0.65          |
| 18                 | -0.43               | -6.48          |
| 19                 | -0.29               | -6.86          |
| 20                 | -0.14               | -17.62         |
| 21                 | 0.00                | -31.22         |
| 22                 | 0.14                | -34.50         |
| 23                 | 0.28                | -26.51         |
| 24                 | 0.42                | -4.32          |
| 25                 | 0.57                | 21.26          |
| 26                 | 0.71                | 17.24          |
| 27                 | 0.85                | 7.20           |
| 28                 | 1.00                | 4.18           |
| 29                 | 1.14                | 3.74           |
| 30                 | 1.29                | 2.87           |
| 31                 | 1.43                | 3.21           |
| 32                 | 1.57                | 2.46           |
| 33                 | 1.72                | 3.12           |
| 34                 | 1.86                | 2.72           |
| 35                 | 2.00                | 2.73           |
| 36                 | 2.15                | 2.66           |
| 37                 | 2.29                | 2.47           |
| 38                 | 2.43                | 1.81           |
| 39                 | 2.58                | 2.30           |

| TS2                                     |       |            |
|-----------------------------------------|-------|------------|
| # Total Energy along IRC                |       |            |
| # X-Axis: Intrinsic Reaction Coordinate |       |            |
| # Y-Axis: Total Energy (kcal/mol)       |       |            |
| Points                                  | X     | Y          |
| 1                                       | 2.09  | -409752.52 |
| 2                                       | 1.99  | -409751.51 |
| 3                                       | 1.88  | -409750.39 |
| 4                                       | 1.78  | -409749.12 |
| 5                                       | 1.67  | -409747.70 |
| 6                                       | 1.57  | -409746.12 |
| 7                                       | 1.46  | -409744.37 |
| 8                                       | 1.36  | -409742.44 |
| 9                                       | 1.26  | -409740.32 |
| 10                                      | 1.15  | -409737.98 |
| 11                                      | 1.05  | -409735.42 |
| 12                                      | 0.94  | -409732.62 |
| 13                                      | 0.84  | -409729.56 |
| 14                                      | 0.73  | -409726.24 |
| 15                                      | 0.63  | -409722.69 |
| 16                                      | 0.52  | -409718.98 |
| 17                                      | 0.42  | -409715.31 |
| 18                                      | 0.31  | -409711.95 |
| 19                                      | 0.21  | -409709.22 |
| 20                                      | 0.10  | -409707.41 |
| 21                                      | 0.00  | -409706.78 |
| 22                                      | -0.10 | -409707.39 |
| 23                                      | -0.21 | -409709.12 |
| 24                                      | -0.31 | -409711.81 |
| 25                                      | -0.42 | -409715.33 |
| 26                                      | -0.52 | -409719.53 |
| 27                                      | -0.63 | -409724.19 |
| 28                                      | -0.73 | -409729.09 |
| 29                                      | -0.84 | -409733.97 |
| 30                                      | -0.94 | -409738.63 |
| 31                                      | -1.05 | -409742.94 |
| 32                                      | -1.15 | -409746.85 |
| 33                                      | -1.26 | -409750.33 |
| 34                                      | -1.36 | -409753.40 |
| 35                                      | -1.47 | -409756.04 |
| 36                                      | -1.57 | -409758.27 |
| 37                                      | -1.67 | -409760.11 |
| 38                                      | -1.78 | -409761.59 |
| 39                                      | -1.88 | -409762.74 |
| 40                                      | -1.99 | -409763.64 |
| 41                                      | -2.09 | -409764.34 |

| TS2 Reaction Force |                     |                |
|--------------------|---------------------|----------------|
| Point              | Reaction coordinate | Reaction Force |
| 1                  | -2.09               | -9.64          |
| 2                  | -1.99               | -10.78         |
| 3                  | -1.88               | -12.17         |
| 4                  | -1.78               | -13.58         |
| 5                  | -1.67               | -15.09         |
| 6                  | -1.57               | -16.70         |
| 7                  | -1.47               | -18.44         |
| 8                  | -1.36               | -20.30         |
| 9                  | -1.26               | -22.32         |
| 10                 | -1.15               | -24.50         |
| 11                 | -1.05               | -26.80         |
| 12                 | -0.94               | -29.21         |
| 13                 | -0.84               | -31.67         |
| 14                 | -0.73               | -33.98         |
| 15                 | -0.63               | -35.46         |
| 16                 | -0.52               | -35.05         |
| 17                 | -0.42               | -32.04         |
| 18                 | -0.31               | -26.16         |
| 19                 | -0.21               | -17.30         |
| 20                 | -0.10               | -6.02          |
| 21                 | 0.00                | 5.83           |
| 22                 | 0.10                | 16.55          |
| 23                 | 0.21                | 25.74          |
| 24                 | 0.31                | 33.63          |
| 25                 | 0.42                | 40.09          |
| 26                 | 0.52                | 44.63          |
| 27                 | 0.63                | 46.82          |
| 28                 | 0.73                | 46.65          |
| 29                 | 0.84                | 44.57          |
| 30                 | 0.94                | 41.24          |
| 31                 | 1.05                | 37.33          |
| 32                 | 1.15                | 33.32          |
| 33                 | 1.26                | 29.32          |
| 34                 | 1.36                | 25.27          |
| 35                 | 1.46                | 21.32          |
| 36                 | 1.57                | 17.56          |
| 37                 | 1.67                | 14.09          |
| 38                 | 1.78                | 11.05          |
| 39                 | 1.88                | 8.59           |
| 40                 | 1.99                | 6.84           |

| TS2 Force constant |                     |                |
|--------------------|---------------------|----------------|
| Point              | Reaction coordinate | Force constant |
| 1                  | -2.09               | 10.94          |
| 2                  | -1.99               | 13.32          |
| 3                  | -1.88               | 13.47          |
| 4                  | -1.78               | 14.39          |
| 5                  | -1.67               | 15.40          |
| 6                  | -1.57               | 16.62          |
| 7                  | -1.47               | 17.76          |
| 8                  | -1.36               | 19.32          |
| 9                  | -1.26               | 20.88          |
| 10                 | -1.15               | 21.96          |
| 11                 | -1.05               | 23.07          |
| 12                 | -0.94               | 23.49          |
| 13                 | -0.84               | 22.06          |
| 14                 | -0.73               | 14.14          |
| 15                 | -0.63               | -3.96          |
| 16                 | -0.52               | -28.71         |
| 17                 | -0.42               | -56.16         |
| 18                 | -0.31               | -84.71         |
| 19                 | -0.21               | -107.79        |
| 20                 | -0.10               | -113.22        |
| 21                 | 0.00                | -102.37        |
| 22                 | 0.10                | -87.87         |
| 23                 | 0.21                | -75.38         |
| 24                 | 0.31                | -61.72         |
| 25                 | 0.42                | -43.42         |
| 26                 | 0.52                | -20.94         |
| 27                 | 0.63                | 1.63           |
| 28                 | 0.73                | 19.88          |
| 29                 | 0.84                | 31.93          |
| 30                 | 0.94                | 37.37          |
| 31                 | 1.05                | 38.30          |
| 32                 | 1.15                | 38.21          |
| 33                 | 1.26                | 38.71          |
| 34                 | 1.36                | 37.76          |
| 35                 | 1.46                | 35.94          |
| 36                 | 1.57                | 33.16          |
| 37                 | 1.67                | 29.10          |
| 38                 | 1.78                | 23.51          |
| 39                 | 1.88                | 16.80          |

| TS3                                     |       |            |
|-----------------------------------------|-------|------------|
| # Total Energy along IRC                |       |            |
| # X-Axis: Intrinsic Reaction Coordinate |       |            |
| # Y-Axis: Total Energy (kcal/mol)       |       |            |
| Points                                  | X     | Y          |
| 1                                       | 6.84  | -504034.00 |
| 2                                       | 6.49  | -504033.54 |
| 3                                       | 6.15  | -504032.99 |
| 4                                       | 5.80  | -504032.37 |
| 5                                       | 5.45  | -504031.67 |
| 6                                       | 5.10  | -504030.89 |
| 7                                       | 4.76  | -504030.03 |
| 8                                       | 4.41  | -504029.08 |
| 9                                       | 4.06  | -504028.03 |
| 10                                      | 3.71  | -504026.84 |
| 11                                      | 3.36  | -504025.46 |
| 12                                      | 3.02  | -504023.81 |
| 13                                      | 2.67  | -504021.78 |
| 14                                      | 2.34  | -504019.30 |
| 15                                      | 2.00  | -504015.87 |
| 16                                      | 1.66  | -504010.90 |
| 17                                      | 1.39  | -504006.92 |
| 18                                      | 1.05  | -504005.23 |
| 19                                      | 0.70  | -504004.06 |
| 20                                      | 0.35  | -504003.30 |
| 21                                      | 0.00  | -504003.03 |
| 22                                      | -0.35 | -504003.29 |
| 23                                      | -0.70 | -504003.94 |
| 24                                      | -1.03 | -504004.58 |
| 25                                      | -1.30 | -504004.91 |
| 26                                      | -1.63 | -504005.21 |
| 27                                      | -1.98 | -504005.50 |
| 28                                      | -2.32 | -504005.76 |
| 29                                      | -2.66 | -504005.98 |
| 30                                      | -2.98 | -504006.13 |
| 31                                      | -3.28 | -504006.22 |
| 32                                      | -3.61 | -504006.30 |
| 33                                      | -3.95 | -504006.37 |
| 34                                      | -4.29 | -504006.44 |

| TS3 Reaction Force |                     |                |
|--------------------|---------------------|----------------|
| Point              | Reaction coordinate | Reaction Force |
| 1                  | -4.29               | -1.38          |
| 2                  | -3.95               | -1.60          |
| 3                  | -3.61               | -1.90          |
| 4                  | -3.28               | -2.37          |
| 5                  | -2.98               | -2.43          |
| 6                  | -2.66               | -2.52          |
| 7                  | -2.32               | -2.74          |
| 8                  | -1.98               | -3.04          |
| 9                  | -1.63               | -3.59          |
| 10                 | -1.30               | -5.22          |
| 11                 | -1.03               | -4.90          |
| 12                 | -0.70               | -5.82          |
| 13                 | -0.35               | -7.13          |
| 14                 | 0.00                | -9.84          |
| 15                 | 0.35                | -14.26         |
| 16                 | 0.70                | -11.43         |
| 17                 | 1.05                | -4.89          |
| 18                 | 1.39                | -4.35          |
| 19                 | 1.66                | -2.23          |
| 20                 | 2.00                | -0.80          |
| 21                 | 2.34                | 0.77           |
| 22                 | 2.67                | 1.87           |
| 23                 | 3.02                | 1.85           |
| 24                 | 3.36                | 0.96           |
| 25                 | 3.71                | 0.86           |
| 26                 | 4.06                | 0.82           |
| 27                 | 4.41                | 0.75           |
| 28                 | 4.76                | 0.62           |
| 29                 | 5.10                | 0.43           |
| 30                 | 5.45                | 0.27           |
| 31                 | 5.80                | 0.23           |
| 32                 | 6.15                | 0.21           |
| 33                 | 6.49                | 0.20           |



| TS3 Force constant |                     |                |
|--------------------|---------------------|----------------|
| Point              | Reaction coordinate | Force constant |
| 1                  | -4.29               | 0.64           |
| 2                  | -3.95               | 0.89           |
| 3                  | -3.61               | 1.43           |
| 4                  | -3.28               | 0.20           |
| 5                  | -2.98               | 0.30           |
| 6                  | -2.66               | 0.62           |
| 7                  | -2.32               | 0.87           |
| 8                  | -1.98               | 1.60           |
| 9                  | -1.63               | 4.92           |
| 10                 | -1.30               | -1.21          |
| 11                 | -1.03               | 2.74           |
| 12                 | -0.70               | 3.76           |
| 13                 | -0.35               | 7.77           |
| 14                 | 0.00                | 12.68          |
| 15                 | 0.35                | -8.10          |
| 16                 | 0.70                | -18.79         |
| 17                 | 1.05                | -1.57          |
| 18                 | 1.39                | -7.85          |
| 19                 | 1.66                | -4.20          |
| 20                 | 2.00                | -4.69          |
| 21                 | 2.34                | -3.26          |
| 22                 | 2.67                | 0.05           |
| 23                 | 3.02                | 2.58           |
| 24                 | 3.36                | 0.27           |
| 25                 | 3.71                | 0.14           |
| 26                 | 4.06                | 0.19           |
| 27                 | 4.41                | 0.37           |
| 28                 | 4.76                | 0.54           |
| 29                 | 5.10                | 0.48           |
| 30                 | 5.45                | 0.11           |
| 31                 | 5.80                | 0.04           |
| 32                 | 6.15                | 0.00           |

| TS4                                     |       |            |
|-----------------------------------------|-------|------------|
| # Total Energy along IRC                |       |            |
| # X-Axis: Intrinsic Reaction Coordinate |       |            |
| # Y-Axis: Total Energy (kcal/mol)       |       |            |
| Points                                  | X     | Y          |
| 1                                       | 6.11  | -504082.90 |
| 2                                       | 5.80  | -504082.49 |
| 3                                       | 5.50  | -504082.03 |
| 4                                       | 5.20  | -504081.50 |
| 5                                       | 4.89  | -504080.87 |
| 6                                       | 4.59  | -504080.14 |
| 7                                       | 4.28  | -504079.25 |
| 8                                       | 3.98  | -504078.18 |
| 9                                       | 3.67  | -504076.88 |
| 10                                      | 3.37  | -504075.31 |
| 11                                      | 3.06  | -504073.46 |
| 12                                      | 2.76  | -504071.24 |
| 13                                      | 2.45  | -504068.51 |
| 14                                      | 2.15  | -504065.04 |
| 15                                      | 1.84  | -504060.74 |
| 16                                      | 1.53  | -504055.68 |
| 17                                      | 1.23  | -504050.07 |
| 18                                      | 0.92  | -504044.36 |
| 19                                      | 0.61  | -504039.27 |
| 20                                      | 0.30  | -504035.70 |
| 21                                      | 0.00  | -504034.47 |
| 22                                      | -0.31 | -504036.36 |
| 23                                      | -0.61 | -504041.45 |
| 24                                      | -0.92 | -504048.87 |
| 25                                      | -1.23 | -504057.49 |
| 26                                      | -1.54 | -504066.56 |
| 27                                      | -1.84 | -504075.71 |
| 28                                      | -2.15 | -504084.73 |
| 29                                      | -2.46 | -504093.46 |
| 30                                      | -2.77 | -504101.80 |
| 31                                      | -3.07 | -504109.65 |
| 32                                      | -3.38 | -504116.90 |
| 33                                      | -3.69 | -504123.39 |
| 34                                      | -4.00 | -504129.03 |
| 35                                      | -4.30 | -504133.70 |
| 36                                      | -4.61 | -504137.56 |
| 37                                      | -4.92 | -504140.73 |
| 38                                      | -5.22 | -504143.37 |
| 39                                      | -5.53 | -504145.60 |
| 40                                      | -5.83 | -504147.46 |
| 41                                      | -6.14 | -504149.05 |

| TS4 Reaction Force |                     |                |
|--------------------|---------------------|----------------|
| Point              | Reaction coordinate | Reaction Force |
| 1                  | -6.14               | -1.33          |
| 2                  | -5.83               | -1.50          |
| 3                  | -5.53               | -1.76          |
| 4                  | -5.22               | -2.03          |
| 5                  | -4.92               | -2.41          |
| 6                  | -4.61               | -2.88          |
| 7                  | -4.30               | -3.48          |
| 8                  | -4.00               | -4.23          |
| 9                  | -3.69               | -5.10          |
| 10                 | -3.38               | -6.03          |
| 11                 | -3.07               | -7.21          |
| 12                 | -2.77               | -8.91          |
| 13                 | -2.46               | -11.27         |
| 14                 | -2.15               | -13.98         |
| 15                 | -1.84               | -16.46         |
| 16                 | -1.54               | -18.25         |
| 17                 | -1.23               | -18.60         |
| 18                 | -0.92               | -16.54         |
| 19                 | -0.61               | -11.62         |
| 20                 | -0.31               | -4.03          |
| 21                 | 0.00                | 6.24           |
| 22                 | 0.30                | 16.58          |
| 23                 | 0.61                | 24.11          |
| 24                 | 0.92                | 28.04          |
| 25                 | 1.23                | 29.52          |
| 26                 | 1.53                | 29.77          |
| 27                 | 1.84                | 29.36          |
| 28                 | 2.15                | 28.63          |
| 29                 | 2.45                | 27.45          |
| 30                 | 2.76                | 25.83          |
| 31                 | 3.06                | 23.76          |
| 32                 | 3.37                | 21.18          |
| 33                 | 3.67                | 18.46          |
| 34                 | 3.98                | 15.30          |
| 35                 | 4.28                | 12.64          |
| 36                 | 4.59                | 10.42          |
| 37                 | 4.89                | 8.69           |
| 38                 | 5.20                | 7.30           |
| 39                 | 5.50                | 6.18           |
| 40                 | 5.80                | 5.22           |

| TS4 Force constant |                     |                |
|--------------------|---------------------|----------------|
| Point              | Reaction coordinate | Force constant |
| 1                  | -6.14               | 0.57           |
| 2                  | -5.83               | 0.83           |
| 3                  | -5.53               | 0.90           |
| 4                  | -5.22               | 1.22           |
| 5                  | -4.92               | 1.55           |
| 6                  | -4.61               | 1.95           |
| 7                  | -4.30               | 2.45           |
| 8                  | -4.00               | 2.84           |
| 9                  | -3.69               | 3.01           |
| 10                 | -3.38               | 3.82           |
| 11                 | -3.07               | 5.53           |
| 12                 | -2.77               | 7.71           |
| 13                 | -2.46               | 8.80           |
| 14                 | -2.15               | 8.07           |
| 15                 | -1.84               | 5.81           |
| 16                 | -1.54               | 1.14           |
| 17                 | -1.23               | -6.70          |
| 18                 | -0.92               | -16.00         |
| 19                 | -0.61               | -24.73         |
| 20                 | -0.31               | -33.48         |
| 21                 | 0.00                | -34.02         |
| 22                 | 0.30                | -24.55         |
| 23                 | 0.61                | -12.78         |
| 24                 | 0.92                | -4.82          |
| 25                 | 1.23                | -0.82          |
| 26                 | 1.53                | 1.34           |
| 27                 | 1.84                | 2.39           |
| 28                 | 2.15                | 3.85           |
| 29                 | 2.45                | 5.33           |
| 30                 | 2.76                | 6.83           |
| 31                 | 3.06                | 8.44           |
| 32                 | 3.37                | 8.90           |
| 33                 | 3.67                | 10.31          |
| 34                 | 3.98                | 8.72           |
| 35                 | 4.28                | 7.30           |
| 36                 | 4.59                | 5.68           |
| 37                 | 4.89                | 4.55           |
| 38                 | 5.20                | 3.68           |
| 39                 | 5.50                | 3.19           |
